# Supplementary material for: A systematic review of hand hygiene improvement strategies: a behavioural approach
Source: Implement Sci. 2012 Sep 14;7:92. doi: 10.1186/1748-5908-7-92 (PMC3517511; doi:10.1186/1748-5908-7-92)
Supplement: Additional file 4 — Calculation of relative difference. [file 1748-5908-7-92-S4.pdf]

## Draft paper

### PRESENTATION OF DATA FROM EPOC STUDIES (RCTs and CBAs)

#### *Notation:*

|        | <b>Study</b> | <b>Control</b> |
|--------|--------------|----------------|
| Pre    | $S_{pre}$    | $C_{pre}$      |
| Post   | $S_{post}$   | $C_{post}$     |
| Change | $S_{change}$ | $C_{change}$   |

(where  $S_{change} = S_{post} - S_{pre}$  and  $C_{change} = C_{post} - C_{pre}$ )

#### *Data to present:*

|                                              |                                                     |    |              |
|----------------------------------------------|-----------------------------------------------------|----|--------------|
| Pretest mean:                                | $S_{pre}$                                           | vs | $C_{pre}$    |
| Posttest mean:                               | $S_{post}$                                          | vs | $C_{post}$   |
| Absolute change (post):                      | $S_{post} - C_{post}$                               |    |              |
| Relative percentage change (post):           | $\frac{(S_{post} - C_{post})}{C_{post}} \times 100$ |    |              |
| Absolute change from baseline:               | $S_{change}$                                        | vs | $C_{change}$ |
| Difference in absolute change from baseline: | $S_{change} - C_{change}$                           |    |              |

#### *Example:*

|        | <b>Study</b> | <b>Control</b> |
|--------|--------------|----------------|
| Pre    | 27%          | 40%            |
| Post   | 55%          | 51%            |
| Change | 28%          | 11%            |

|                                              |            |
|----------------------------------------------|------------|
| Pretest mean:                                | 27% vs 40% |
| Posttest mean:                               | 55% vs 51% |
| Absolute change (post):                      | 4%         |
| Relative percentage change (post):           | 7.8%       |
| Absolute change from baseline:               | 28% vs 11% |
| Difference in absolute change from baseline: | 17%        |
